# Supplementary material for: Phytochemical Screening and Isolation of New Ent-Clerodane Diterpenoids from Croton guatemalensis Lotsy
Source: MDPI journal article supplement (doi:10.3390/plants11223159), 2022-11-18
Supplement: s1 [file s1]

# Phytochemical Screening and Isolation of New *Ent*-Clerodane Diterpenoids from *Croton guatemalensis* Lotsy

Sonia Marlen Escandón-Rivera <sup>1</sup>, Adolfo Andrade-Cetto <sup>1,\*</sup>, Daniel Genaro Rosas-Ramírez <sup>2</sup> and Roberto Arreguín-Espinosa <sup>2</sup>

<sup>1</sup> Departamento de Biología Celular, Facultad de Ciencias, Universidad Nacional Autónoma de México, Av. Universidad 3000, Circuito Exterior S/N, Coyoacán, Ciudad Universitaria, Mexico City 04510, Mexico

<sup>2</sup> Departamento de Biomacromoléculas, Instituto de Química, Universidad Nacional Autónoma de México, Av. Universidad 3000, Circuito Exterior S/N, Coyoacán, Ciudad Universitaria, Mexico City 04510, Mexico

\* Correspondence: aac@ciencias.unam.mx; Tel.: +52-5556225437

## Table of contents

**Figure S1.** The <sup>1</sup>H NMR spectrum of **2** in CDCl<sub>3</sub> (500 MHz).

**Figure S2.** The <sup>13</sup>C NMR spectrum of **2** in CDCl<sub>3</sub> (125 MHz).

**Figure S3.** The DEPT spectrum of **2** in CDCl<sub>3</sub> (125 MHz).

**Figure S4.** The HSQC spectrum of **2** in CDCl<sub>3</sub>.

**Figure S5.** The <sup>1</sup>H-<sup>1</sup>H COSY spectrum of **2** in CDCl<sub>3</sub>.

**Figure S6.** The HMBC spectrum of **2** in CDCl<sub>3</sub>.

**Figure S7.** The NOESY spectrum of **2** in CDCl<sub>3</sub>.

**Figure S8.** The TOCSY spectrum of **2** in CDCl<sub>3</sub>.

**Figure S9.** The ESIMS spectrum of compound **2**.

**Figure S10.** The UV spectrum of compound **2**.

**Figure S11.** The IR spectrum of compound **2**.

**Figure S12.** The <sup>1</sup>H NMR spectrum of **3** in CDCl<sub>3</sub> (500 MHz).

**Figure S13.** The <sup>13</sup>C NMR spectrum of **3** in CDCl<sub>3</sub> (125 MHz).

**Figure S14.** The DEPT spectrum of **3** in CDCl<sub>3</sub> (125 MHz).

**Figure S15.** The HSQC spectrum of **3** in CDCl<sub>3</sub>.

**Figure S16.** The <sup>1</sup>H-<sup>1</sup>H COSY spectrum of **3** in CDCl<sub>3</sub>.

**Figure S17.** The HMBC spectrum of **3** in CDCl<sub>3</sub>.

**Figure S18.** The NOESY spectrum of **3** in CDCl<sub>3</sub>.

**Figure S19.** The TOCSY spectrum of **3** in CDCl<sub>3</sub>.

**Figure S20.** The HRESIMS spectrum of compound **3**.

**Figure S21.** The UV spectrum of compound **3**.

**Figure S22.** The IR spectrum of compound **3**.

**Figure S23.** Calibration curve of rutin (**6**).

**Figure S24.** HPLC-ESIMS spectrum obtained from the affinity screening analysis of the EWE soluble extract with *α*-glucosidase, positive mode.

**Figure S25.** HPLC-ESIMS spectrum obtained from the affinity screening analysis of the EWE soluble extract with *α*-glucosidase, negative mode.

**Table S1.** Standard calibration curve of rutin (**6**).

**Figure S1.** The  $^1\text{H}$  NMR spectrum of **2** in  $\text{CDCl}_3$  (500 MHz).

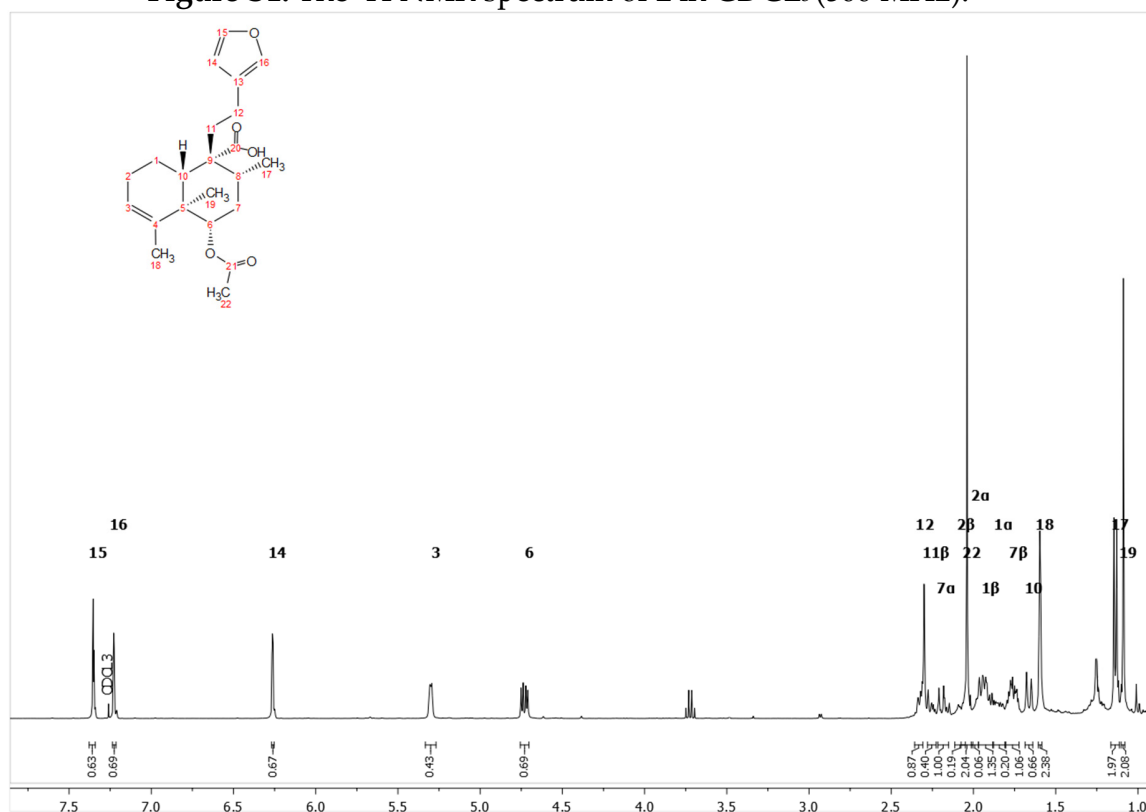

**Figure S2.** The  $^{13}\text{C}$  NMR spectrum of **2** in  $\text{CDCl}_3$  (125 MHz).

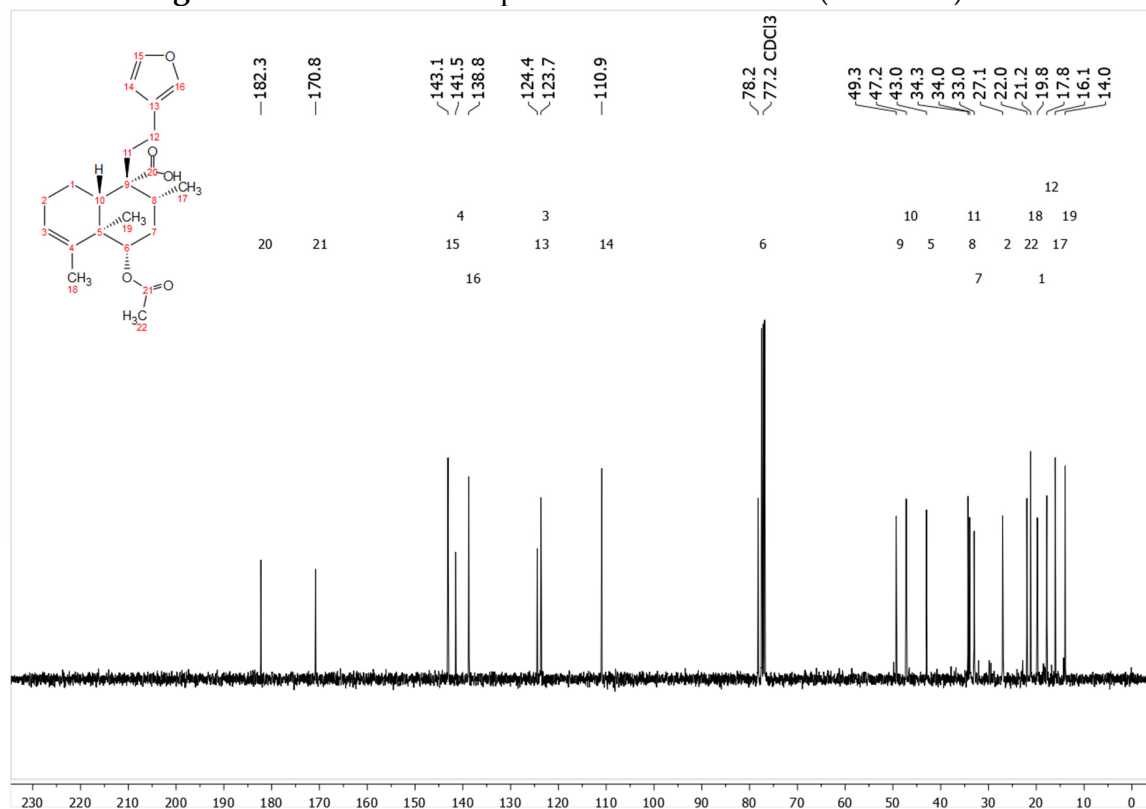

**Figure S3.** The DEPT spectrum of **2** in CDCL<sub>3</sub> (125 MHz).

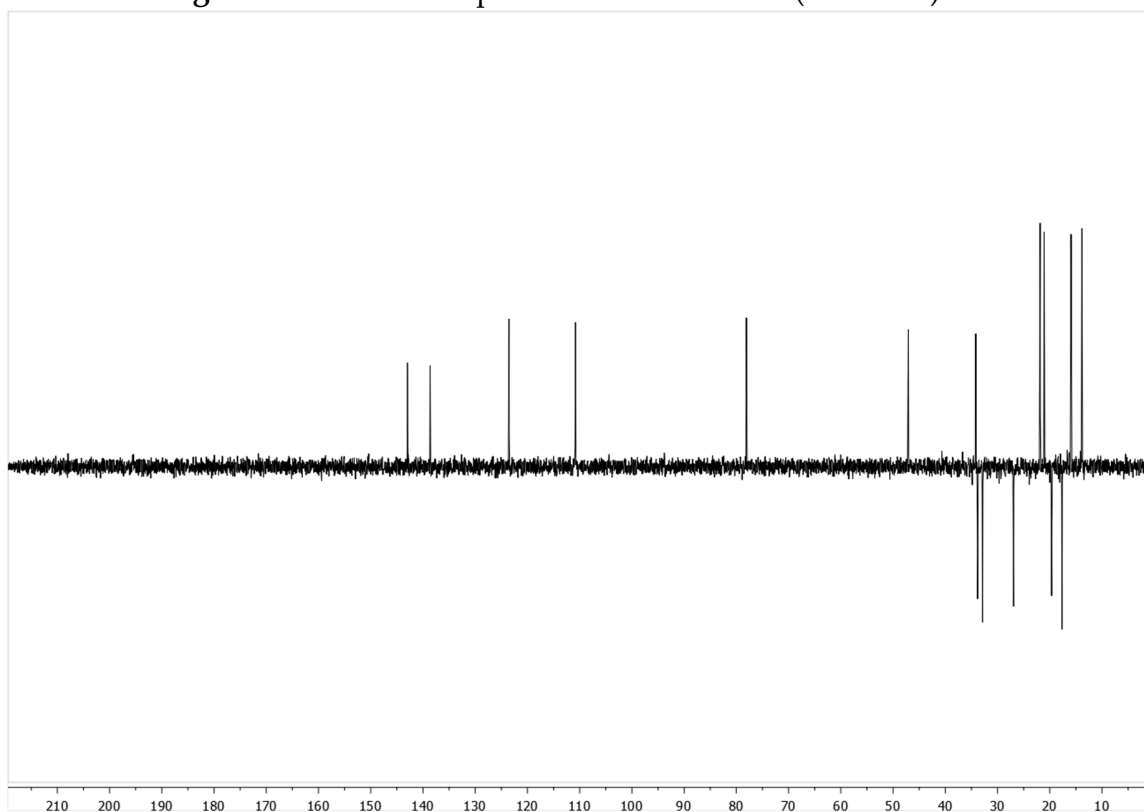

**Figure S4.** The HSQC spectrum of **2** in CDCL<sub>3</sub>.

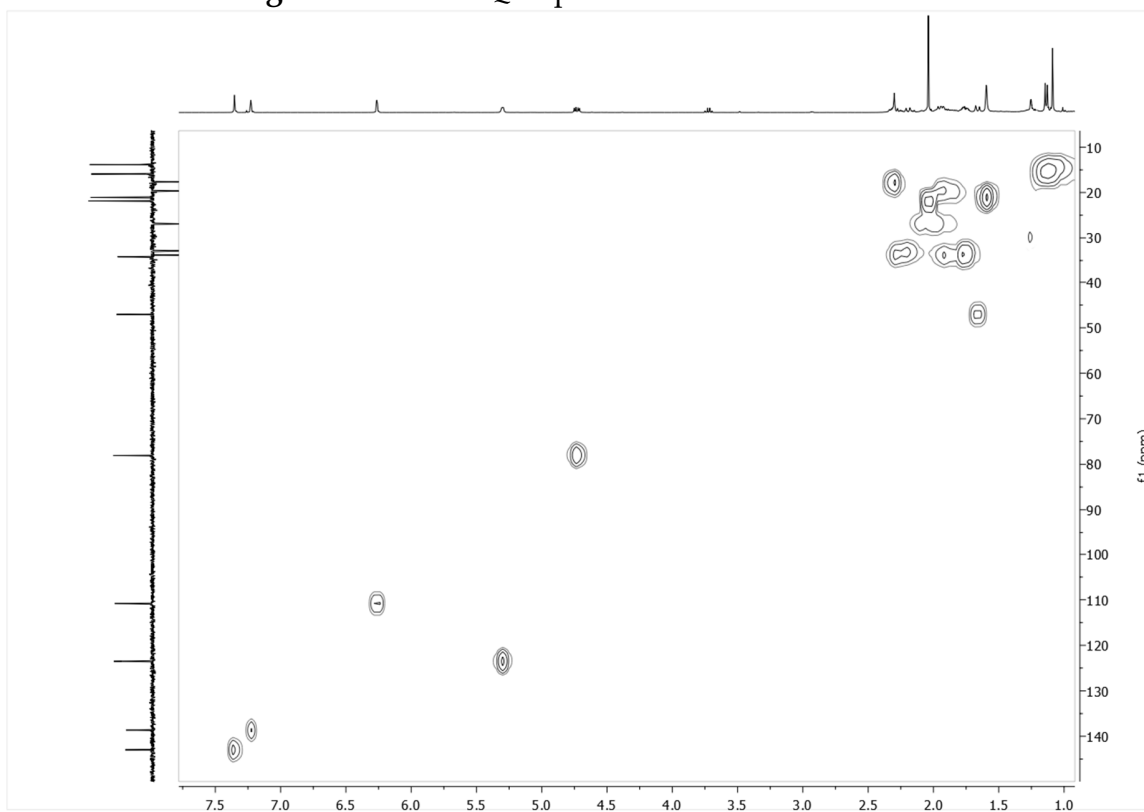

**Figure S5.** The  $^1\text{H}$ - $^1\text{H}$  COSY spectrum of **2** in  $\text{CDCl}_3$ .

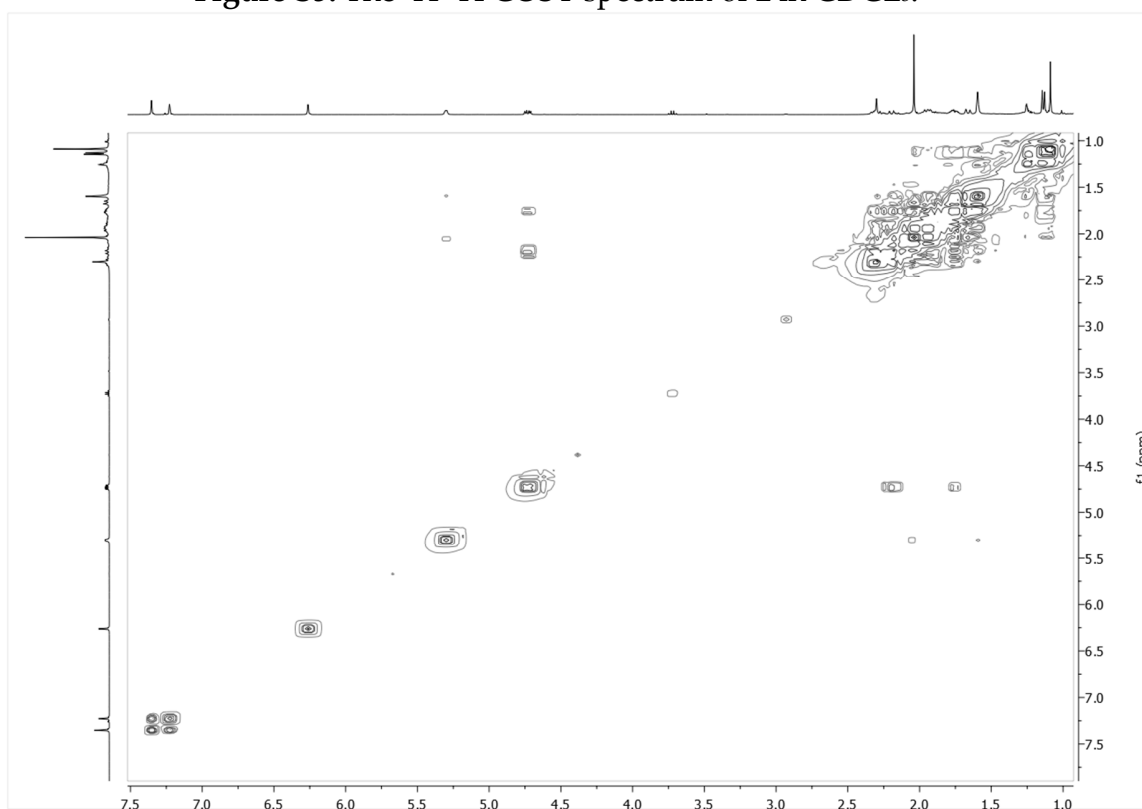

**Figure S6.** The HMBC spectrum of **2** in  $\text{CDCl}_3$ .

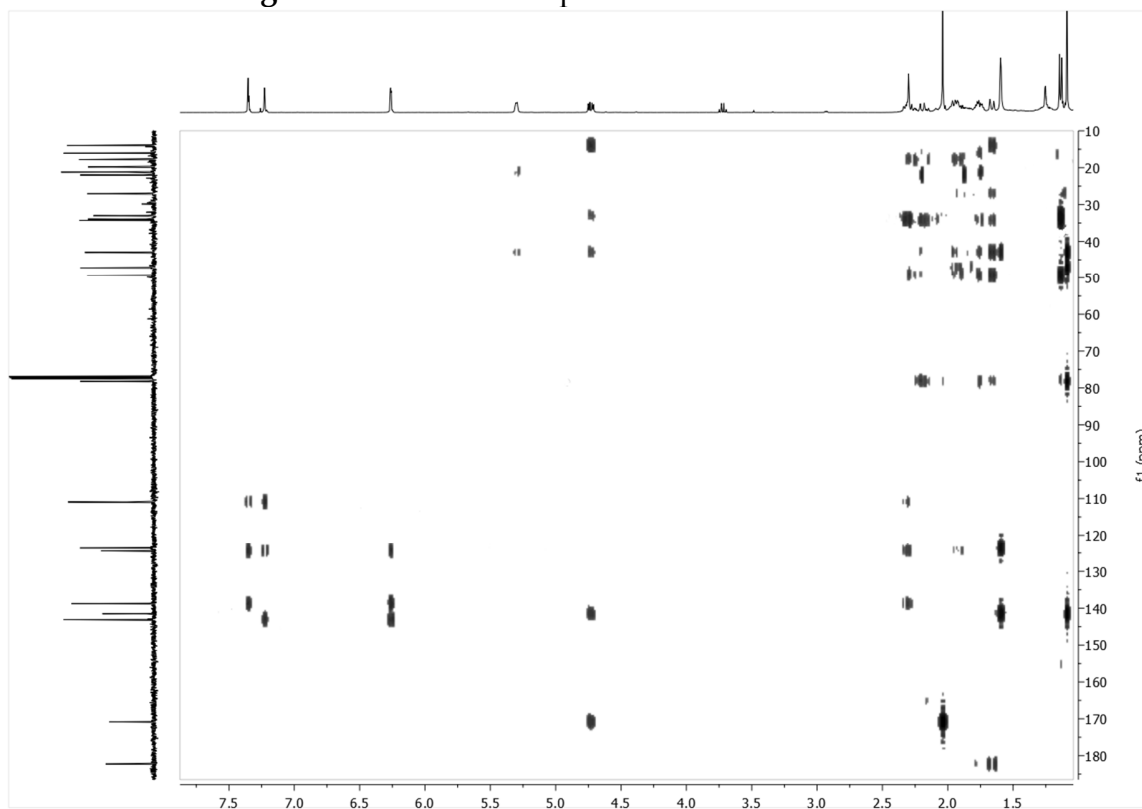

**Figure S7.** The NOESY spectrum of **2** in CDCl<sub>3</sub>.

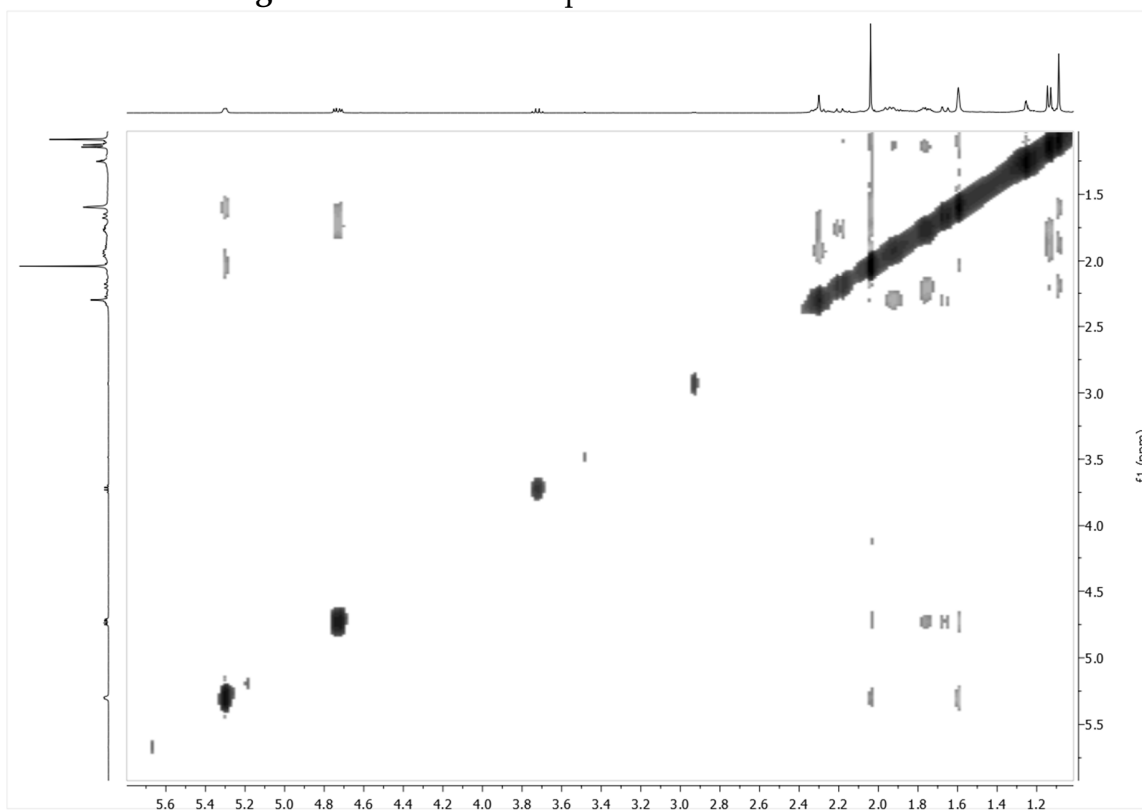

**Figure S8.** The TOCSY spectrum of **2** in CDCl<sub>3</sub>.

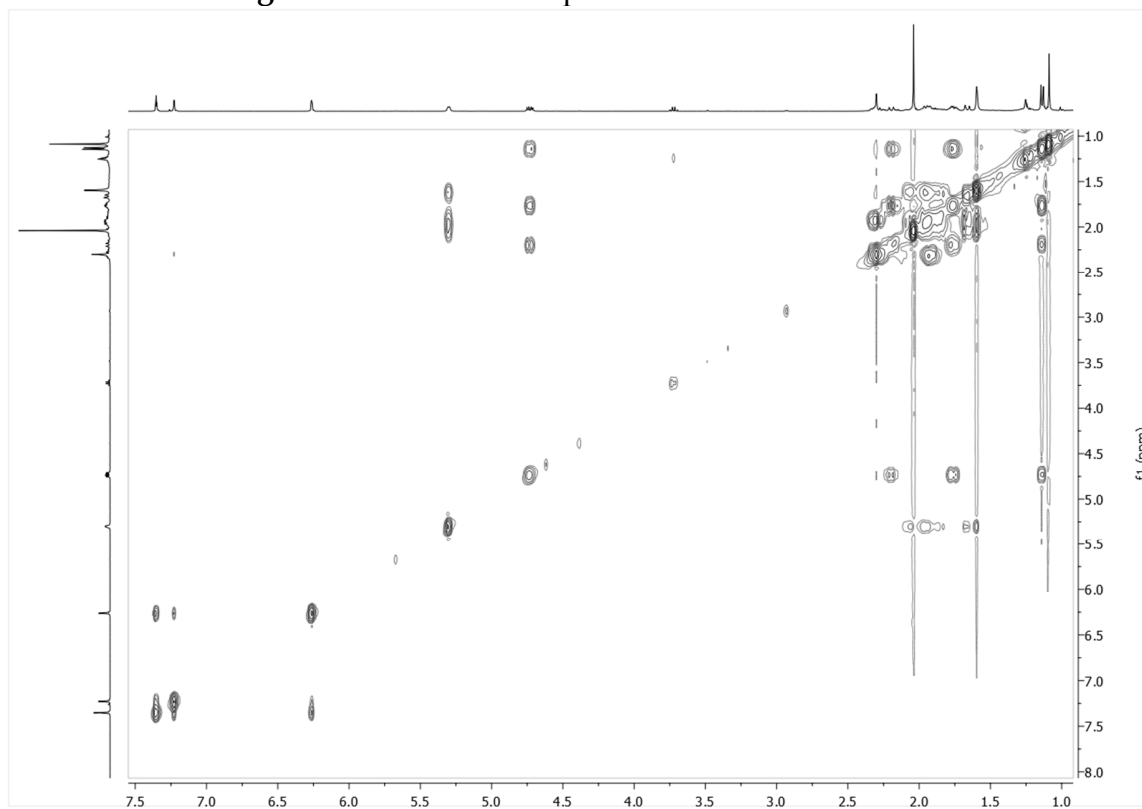

Figure S9. The HRESIMS spectrum of compound 2.

User Spectra

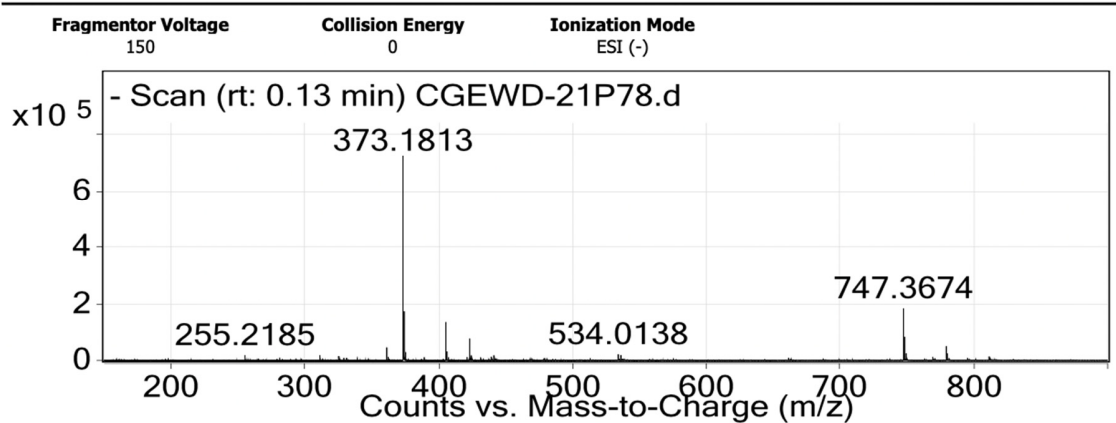

Figure S10. The UV spectrum of compound 2.

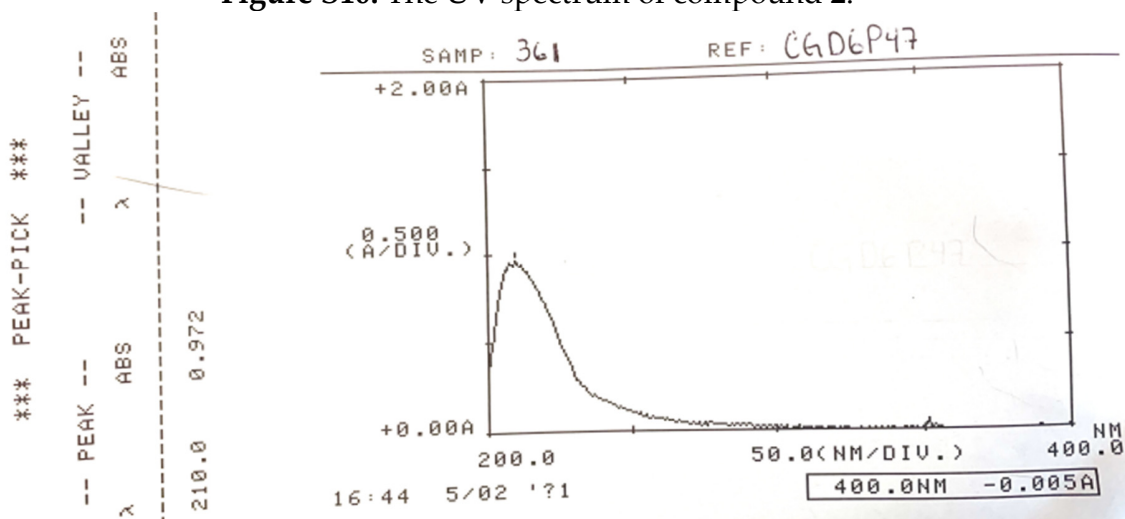

**Figure S11.** The IR spectrum of compound **2**.

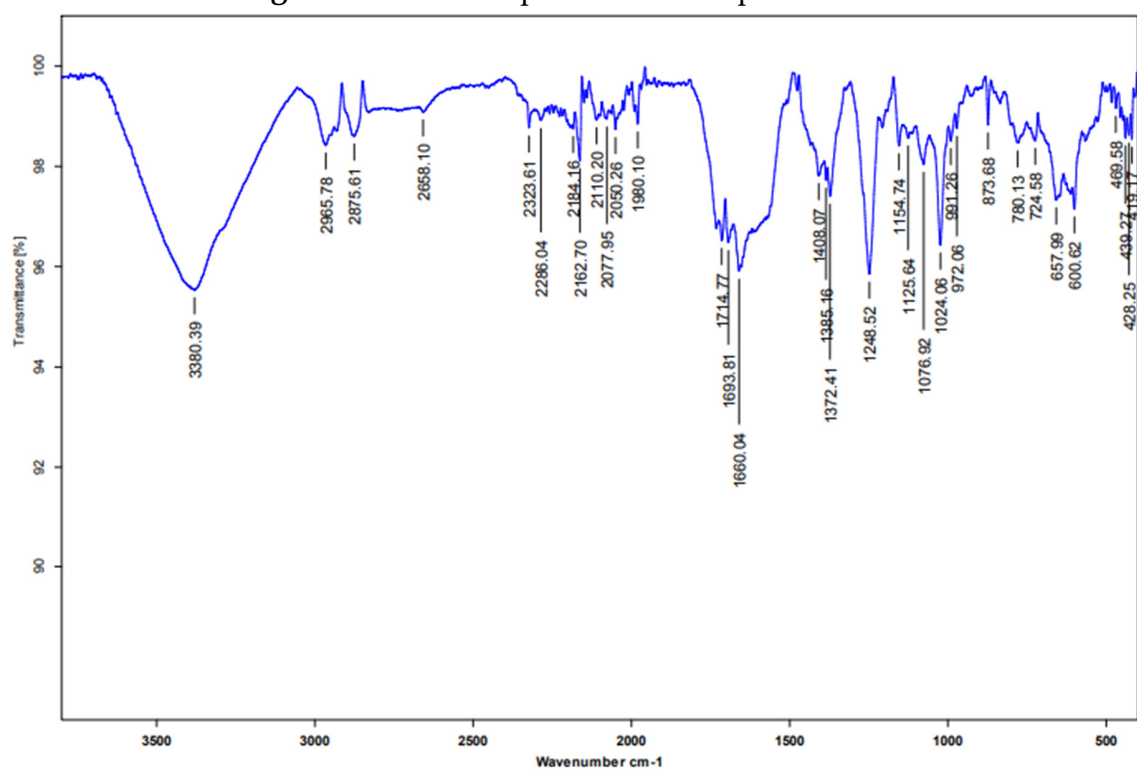

**Figure S12.** The  $^1\text{H}$  NMR spectrum of **3** in  $\text{CDCl}_3$  (500 MHz).

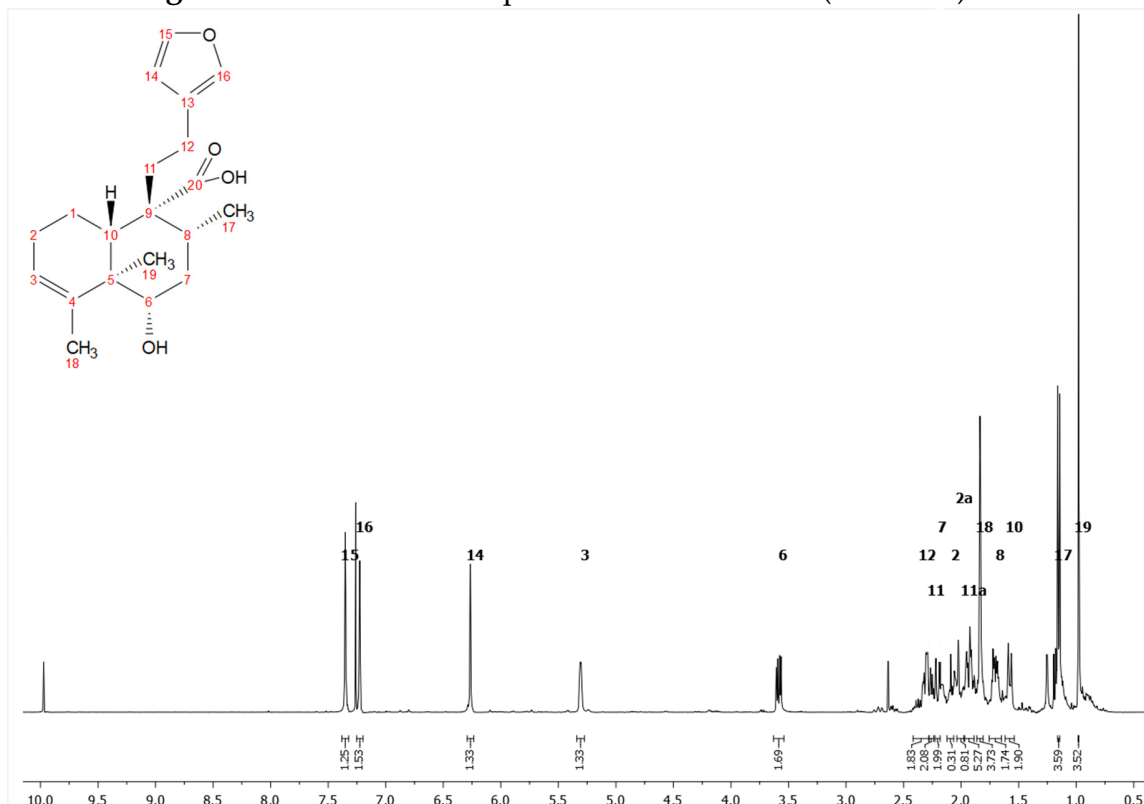

**Figure S13.** The  $^{13}\text{C}$  NMR spectrum of **3** in  $\text{CDCl}_3$  (125 MHz).

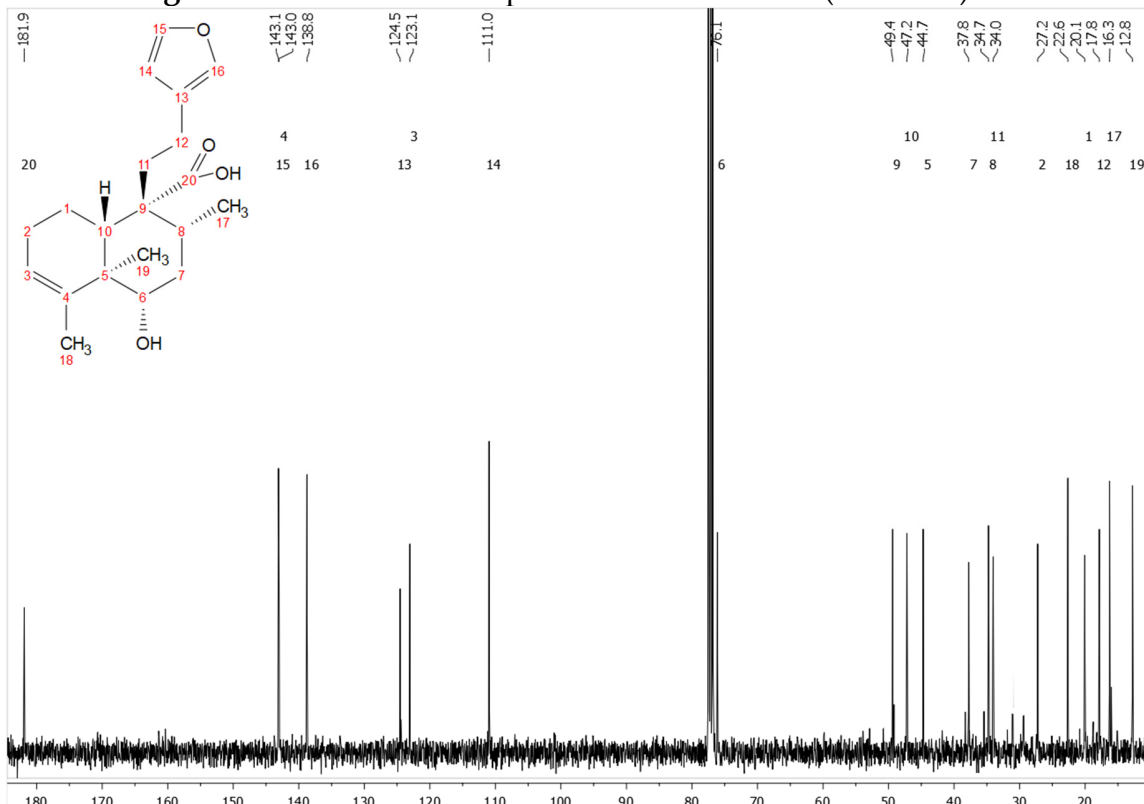



**Figure S14.** The DEPT spectrum of **3** in CDCL<sub>3</sub> (125 MHz).

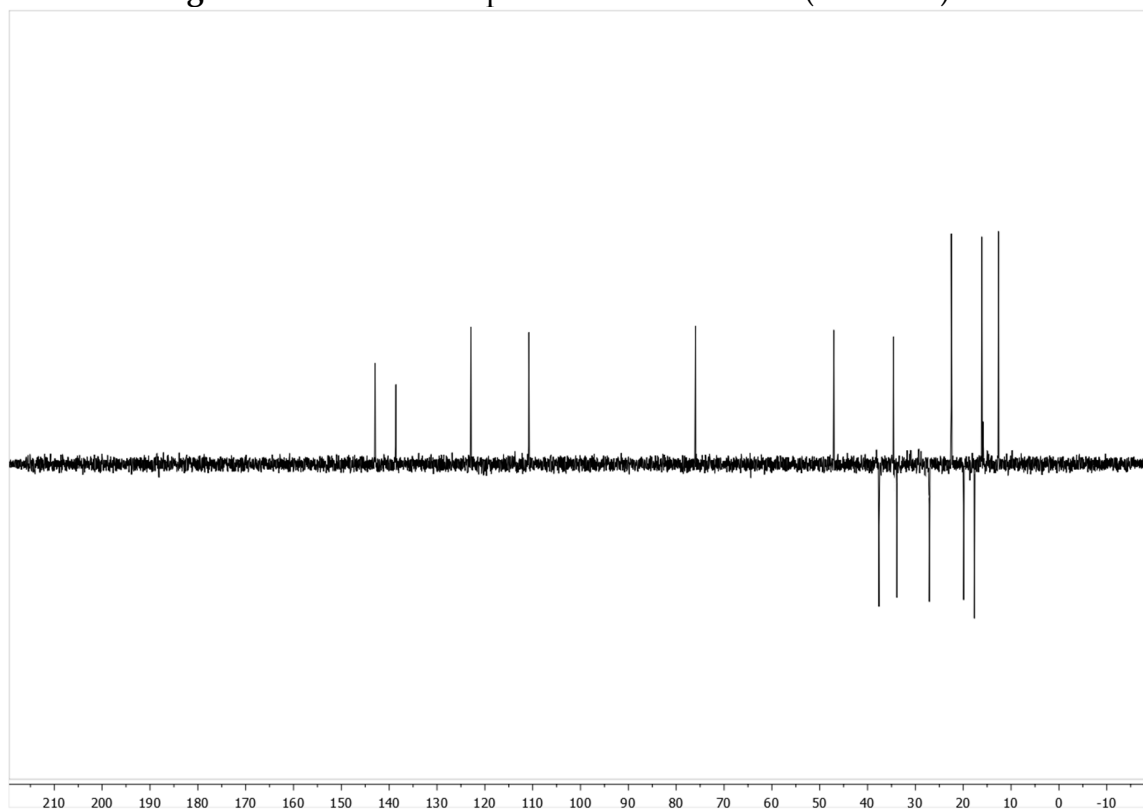

**Figure S15.** The HSQC spectrum of **3** in CDCL<sub>3</sub>.

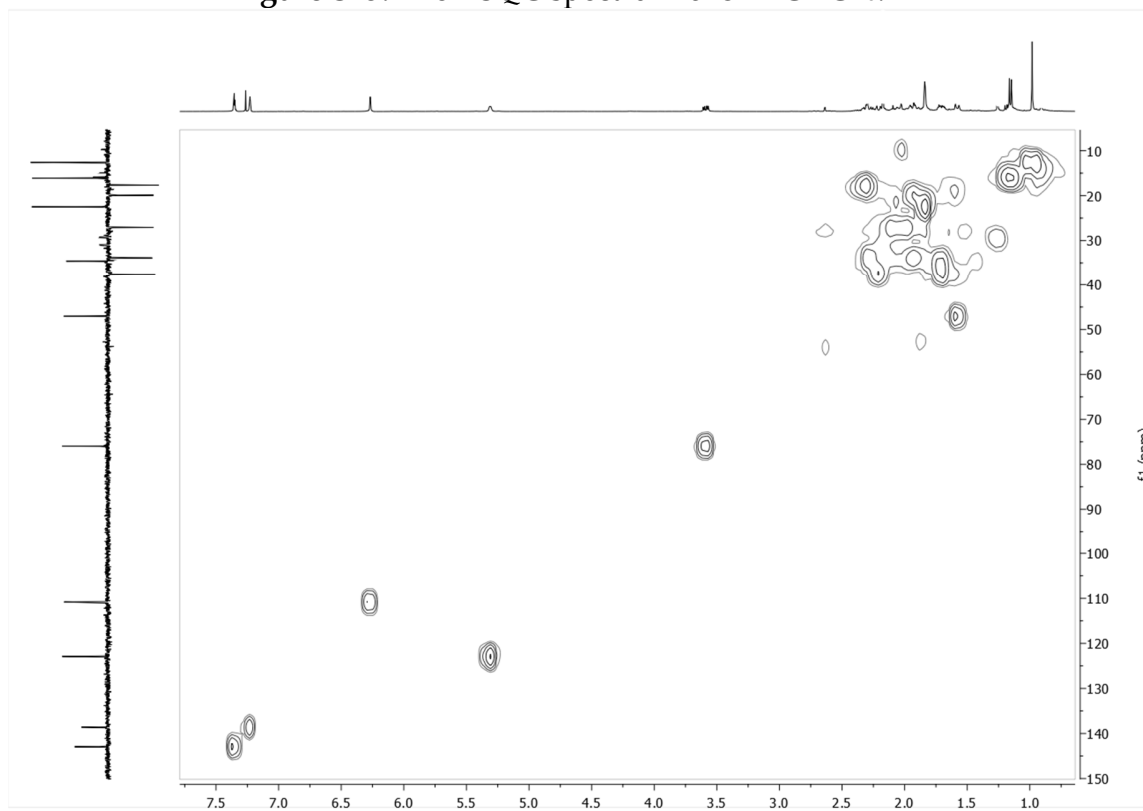

**Figure S16.** The  $^1\text{H}$ - $^1\text{H}$  COSY spectrum of **3** in  $\text{CDCl}_3$ .

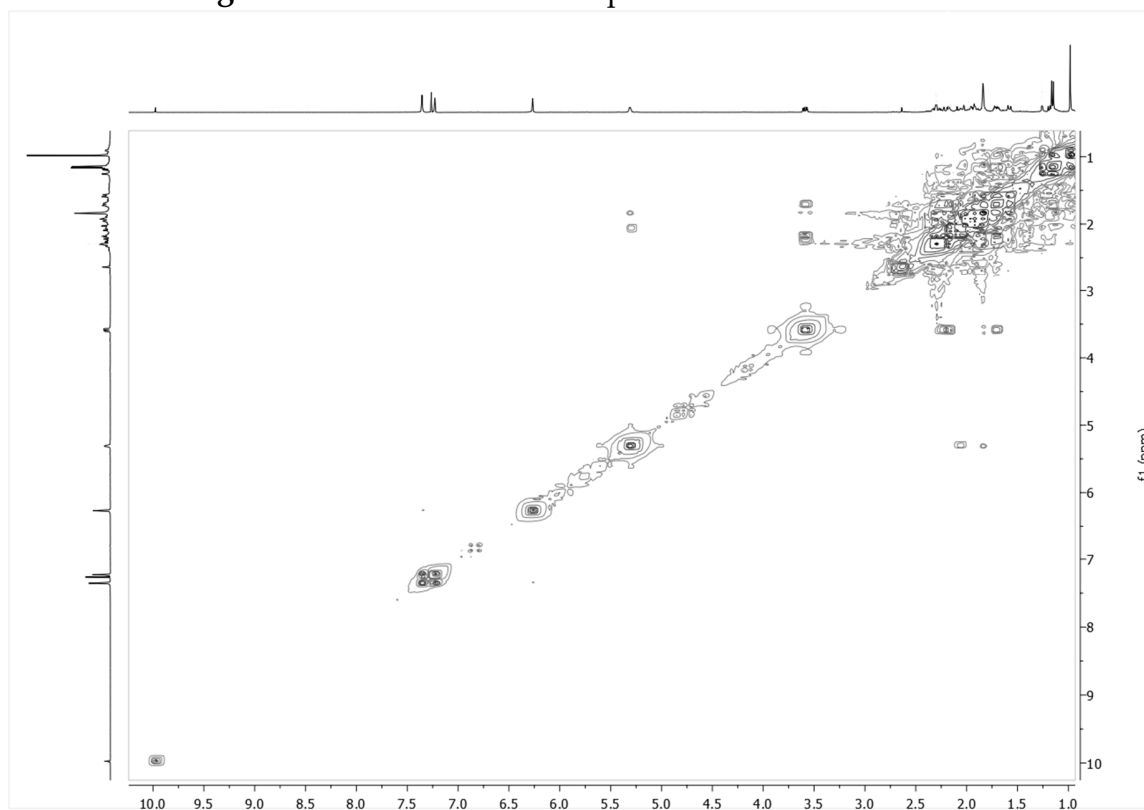

**Figure S17.** The HMBC spectrum of **3** in  $\text{CDCl}_3$ .

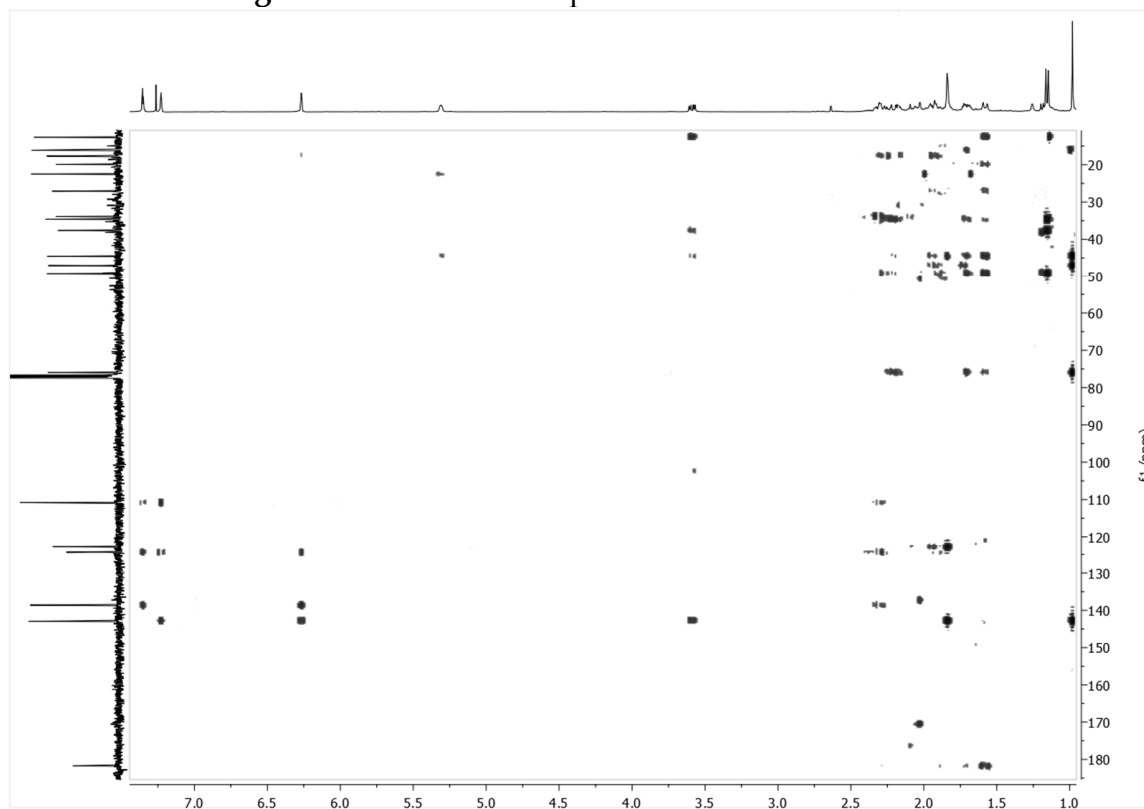

**Figure S18.** The NOESY spectrum of **3** in CDCl<sub>3</sub>.

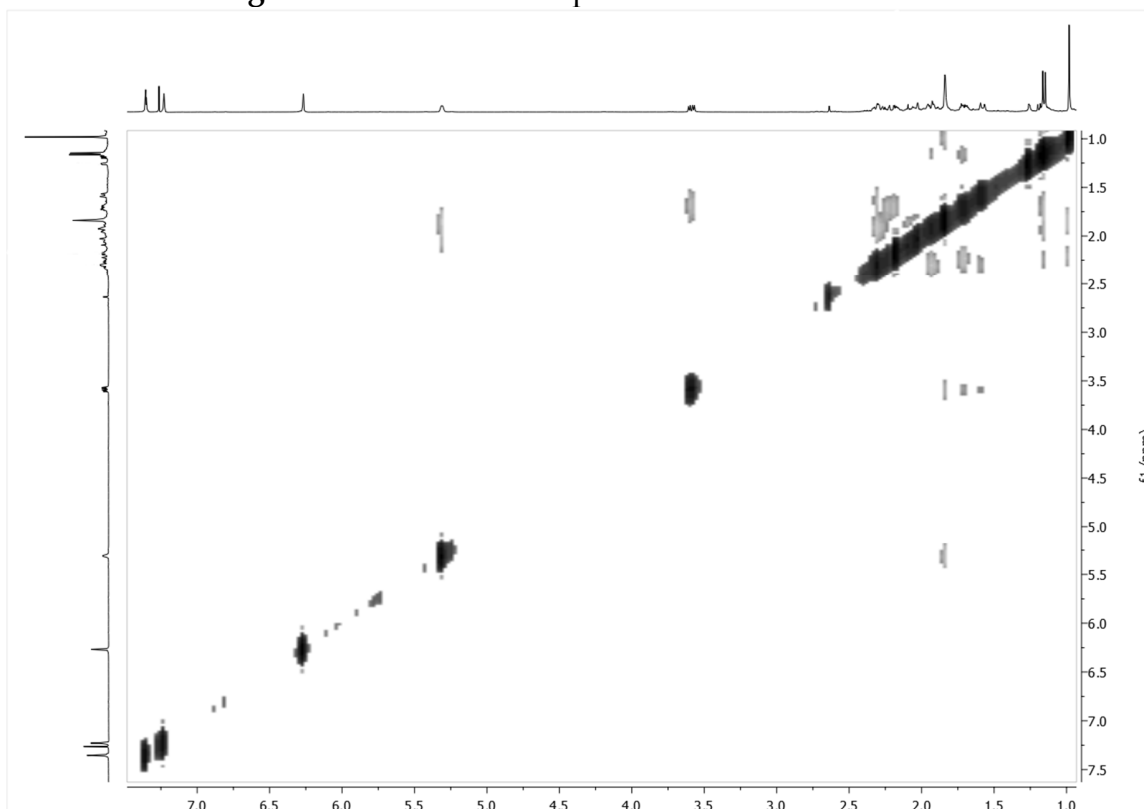

**Figure S19.** The TOCSY spectrum of **3** in CDCl<sub>3</sub>.

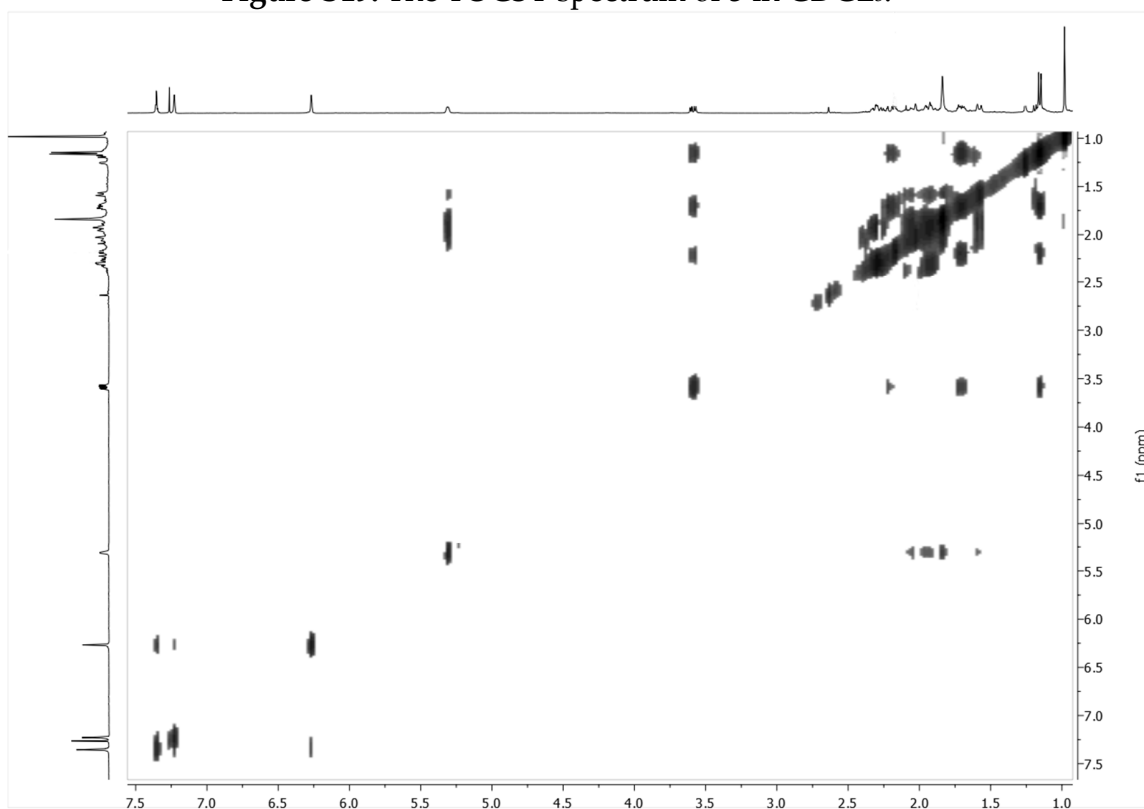

**Figure S20.** The HRESIMS spectrum of compound **3**.

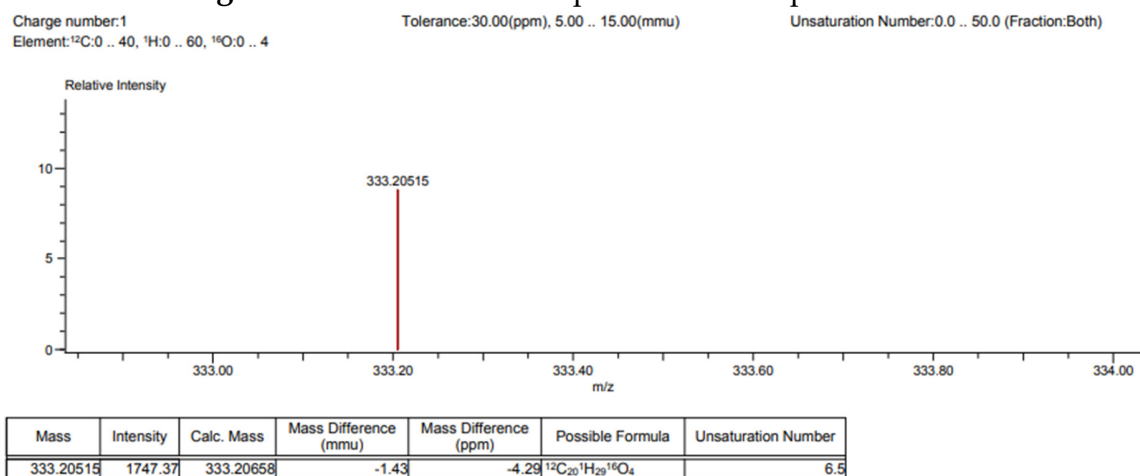

**Figure S21.** The UV spectrum of compound **3**.

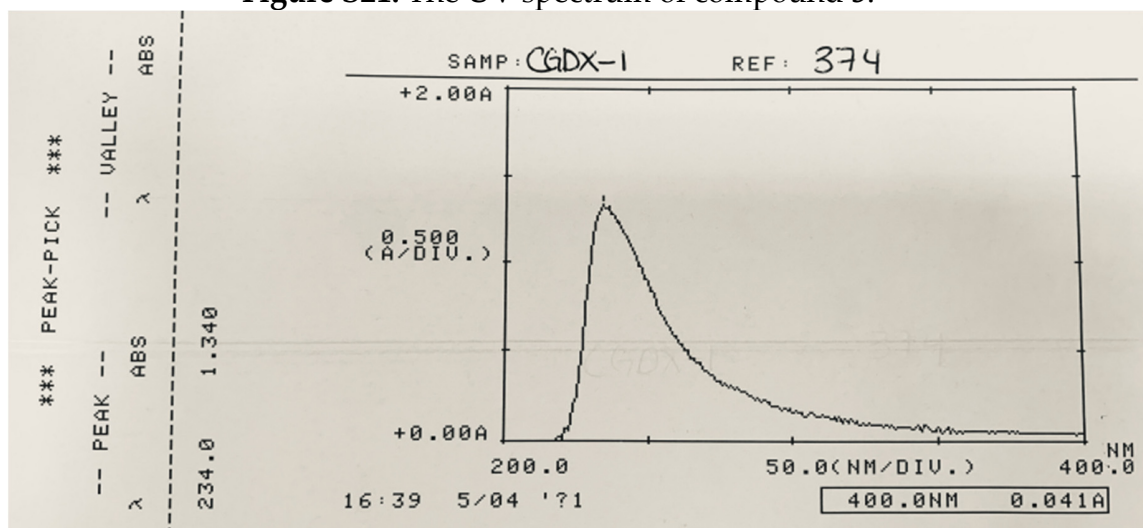

Figure S22. The IR spectrum of compound 3.

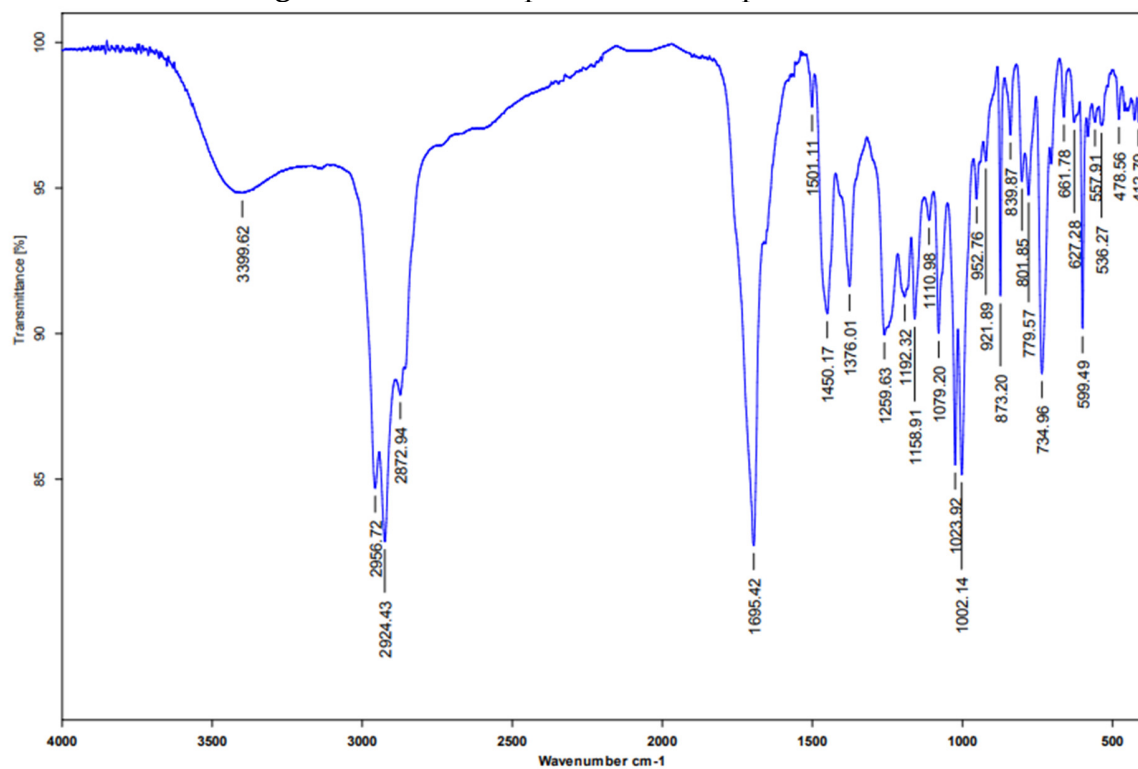

Figure S23. Calibration curve of rutin (6).

Rutin, .99984

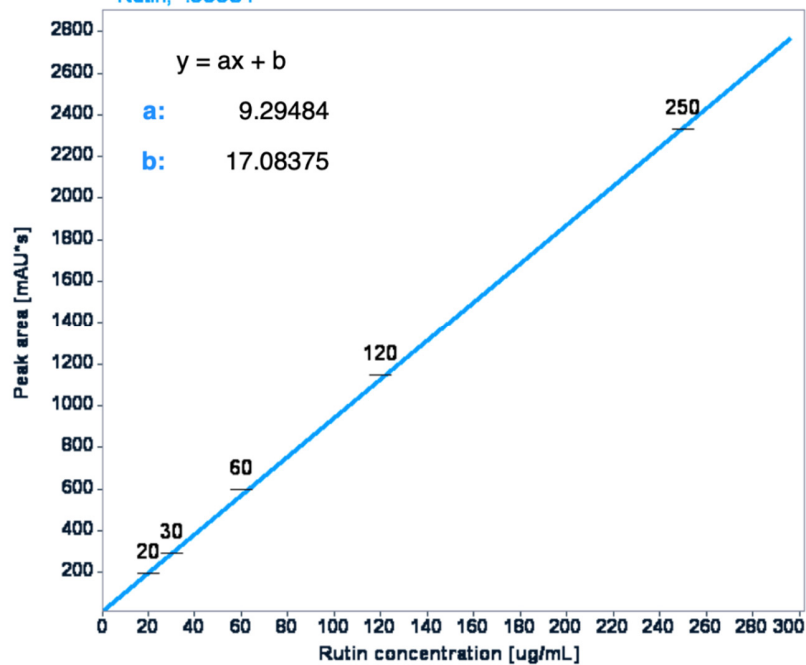

**Figure S24.** HPLC-MS spectrum obtained from the affinity screening analysis of EWE soluble extract with  $\alpha$ -glucosidase, positive mode.

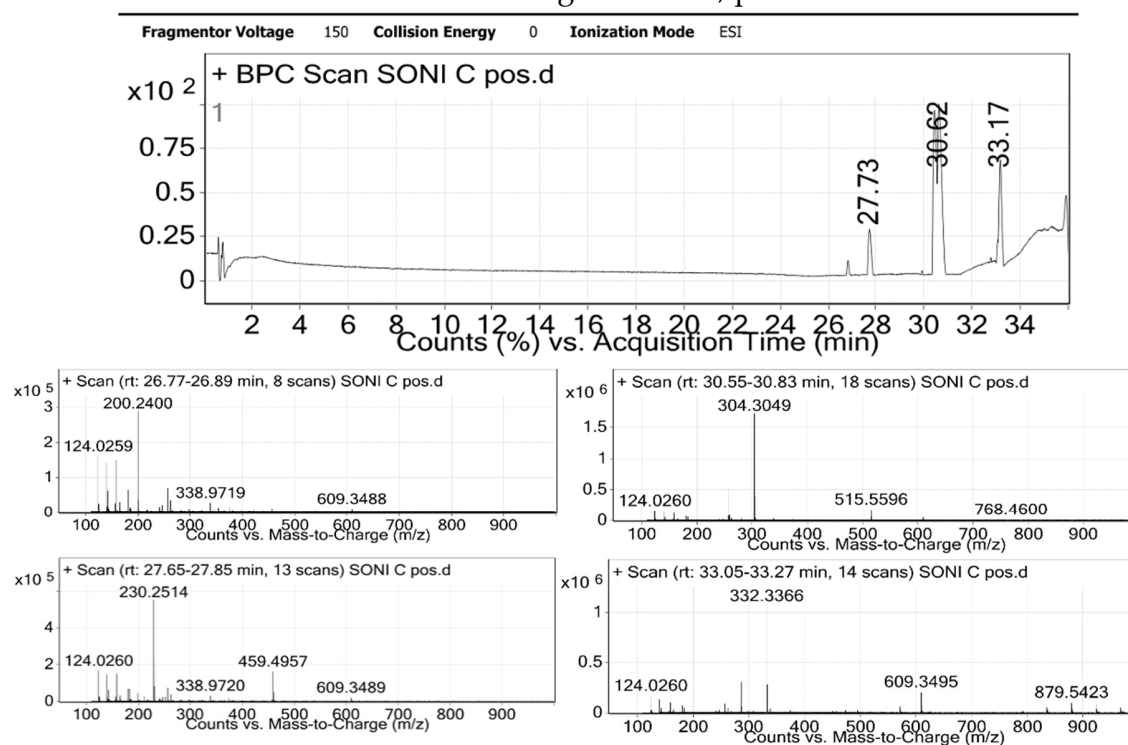

**Figure S25.** HPLC-MS spectrum obtained from the affinity screening analysis of EWE soluble extract with  $\alpha$ -glucosidase, negative mode.

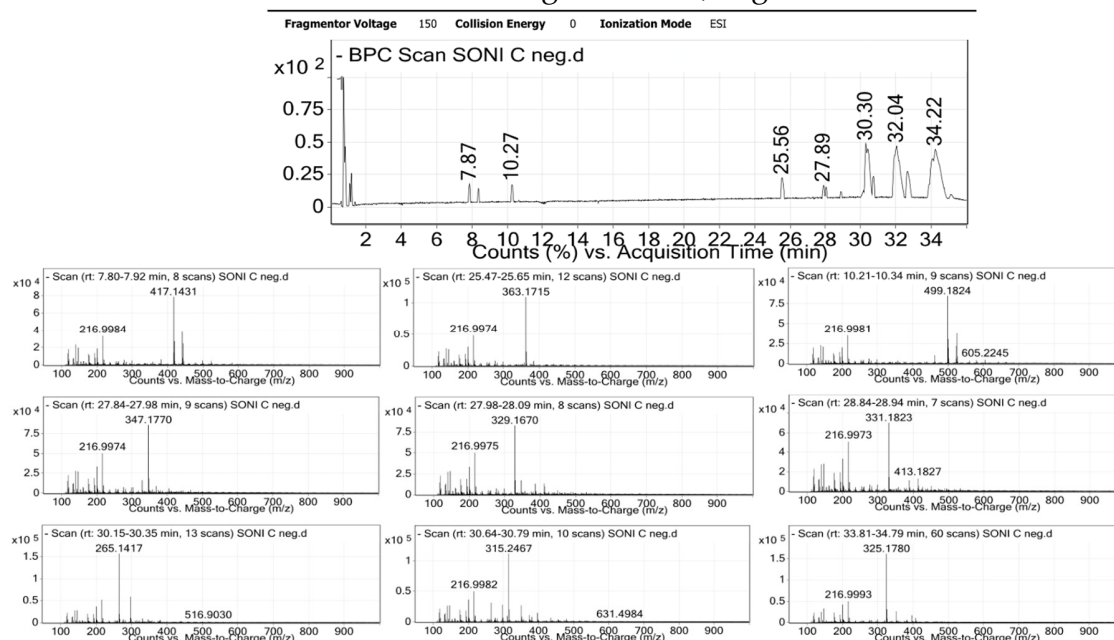

**Table S1.** Standard calibration curve of rutin (6).

| Concentration<br>( $\mu\text{g/mL}$ ) | Area<br>(mAU) | Mean    | %RSD <sup>a</sup> |
|---------------------------------------|---------------|---------|-------------------|
| 20.00                                 | 196.90        | 196.53  | 1.66              |
|                                       | 193.10        |         |                   |
|                                       | 199.60        |         |                   |
| 40.00                                 | 295.00        | 294.37  | 0.50              |
|                                       | 295.40        |         |                   |
|                                       | 292.70        |         |                   |
| 80.00                                 | 598.20        | 597.07  | 0.90              |
|                                       | 591.20        |         |                   |
|                                       | 601.80        |         |                   |
| 120.00                                | 1131.70       | 1146.77 | 1.21              |
|                                       | 1149.70       |         |                   |
|                                       | 1158.90       |         |                   |
| 250.00                                | 2311.10       | 2329.27 | 0.69              |
|                                       | 2341.80       |         |                   |
|                                       | 2334.90       |         |                   |

<sup>a</sup> Relative Standard Deviation Percentage
